# Supplementary material for: Proanthocyanidins as the main pancreatic lipase inhibitors in chokeberry fruits
Source: Royal Society of Chemistry journal article supplement (doi:10.1039/d1fo04429j), 2022-01-01
Supplement: d1fo04429j1.pdf [file d1fo04429j1.pdf]

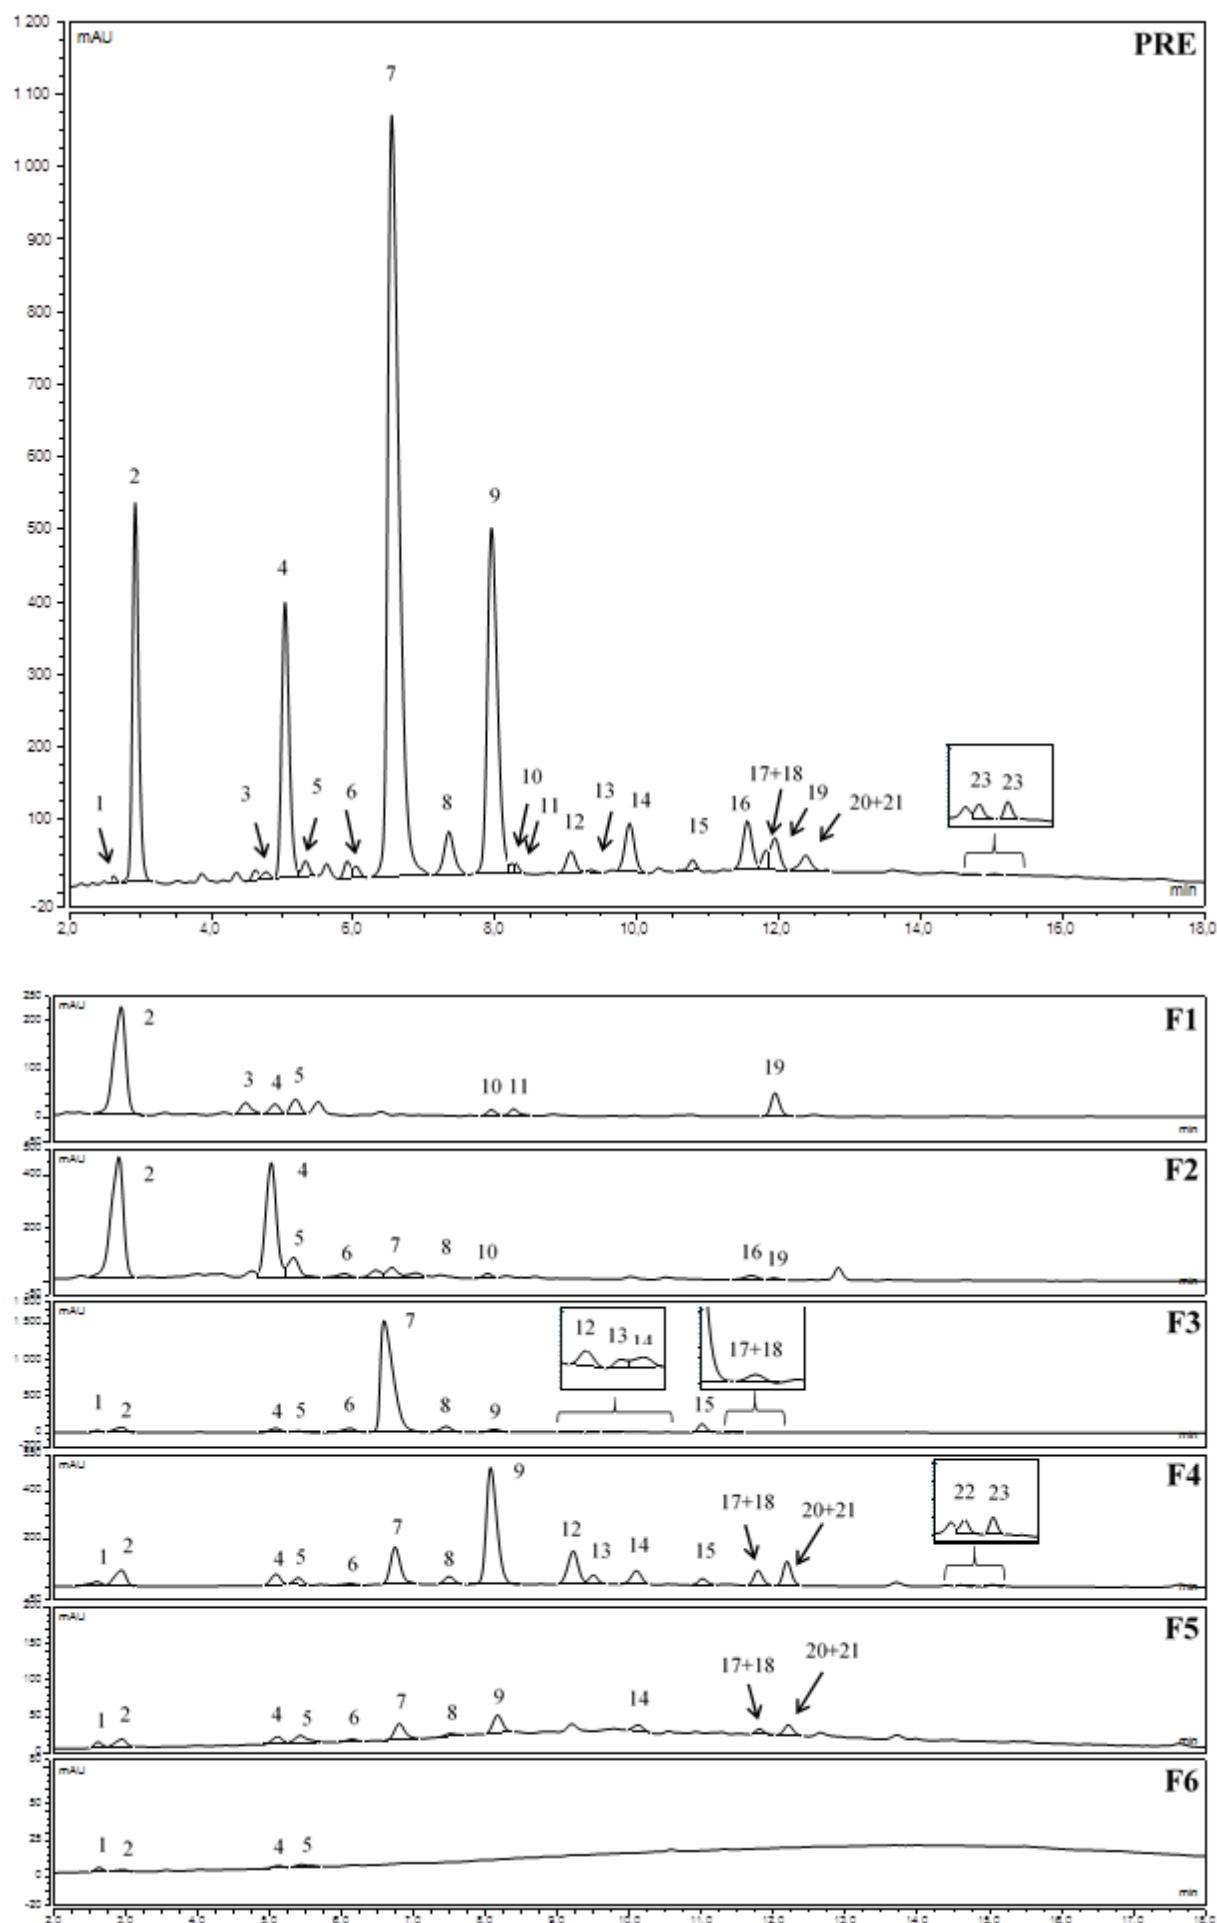

Fig. S1. HPLC chromatograms (280 nm) of compounds in chokeberry fruit polyphenol-rich extract (PRE) and its fractions (F1, F2, F3, F4, F5, and F6) obtained from black chokeberry fruit. The peak number corresponds to the number in Table S1.
