# Supplementary material for: Proanthocyanidins as the main pancreatic lipase inhibitors in chokeberry fruits
Source: Royal Society of Chemistry journal article supplement (doi:10.1039/d1fo04429j), 2022-01-01
Supplement: d1fo04429j2.pdf [file d1fo04429j2.pdf]

**Table S1.** Identification of phenolic compounds in chokeberry polyphenol-rich extract (PRE) and fractions (F1-F6).

| Peak | $t_R$<br>(min) | $\lambda_{max}$<br>(nm) | [MS-H] <sup>-</sup><br>[MS+H] <sup>+</sup><br>( $m/z$ ) | MS/MS<br>( $m/z$ ) | Identity                                                   |
|------|----------------|-------------------------|---------------------------------------------------------|--------------------|------------------------------------------------------------|
| 1    | 2.06           | 261;294                 | 153                                                     | 109                | Protocatechuic acid                                        |
| 2    | 2.95           | 254;325                 | 353                                                     | 191/179/135        | 3- <i>O</i> -caffeoylquinic acid                           |
| 3    | 4.66           | 311                     | 337                                                     | 191/163            | <i>p</i> -coumaroylquinic acid <sup>a</sup>                |
| 4    | 5.08           | 245;325                 | 353                                                     | 191/179/135        | 5- <i>O</i> -caffeoylquinic acid                           |
| 5    | 5.40           | 245;325                 | 353                                                     | 191/179/135        | 4- <i>O</i> -caffeoylquinic acid <sup>a</sup>              |
| 6    | 6.13           | 266;299                 | 319                                                     | 301/165/137        | Depside <sup>a</sup>                                       |
| 7    | 6.74           | 515                     | 449 +                                                   | 287                | Cyanidin 3- <i>O</i> -galactoside                          |
| 8    | 7.49           | 515                     | 449 +                                                   | 287                | Cyanidin 3- <i>O</i> -glucoside                            |
| 9    | 8.07           | 516                     | 419 +                                                   | 287                | Cyanidin 3- <i>O</i> -arabinoside <sup>a</sup>             |
| 10   | 8.08           | 328                     | 353                                                     | 191                | Caffeoylquinic acid <sup>a</sup>                           |
| 11   | 8.39           | 277                     | 565                                                     | 403/223/179        | Sinapoylsiringinic acid hexoside <sup>a</sup>              |
| 12   | 9.22           | 258;353                 | 625                                                     | 301                | Quercetin 3- <i>O</i> -dihexoside <sup>a</sup>             |
| 13   | 9.49           | 257;353                 | 625                                                     | 301                | Quercetin 3- <i>O</i> -dihexoside <sup>a</sup>             |
| 14   | 10.09          | 516                     | 419 +                                                   | 287                | Cyanidin 3- <i>O</i> -xyloside <sup>a</sup>                |
| 15   | 11.02          | 257;355                 | 595                                                     | 301                | Quercetin 3- <i>O</i> -vicianoside <sup>a</sup>            |
| 16   | 11.68          | 284                     | 463                                                     | 287                | Eriodictyol 7-glucuronide <sup>a</sup>                     |
| 17   | 11.78          | 257;355                 | 609                                                     | 301                | Quercetin 3- <i>O</i> -robinoside <sup>a</sup>             |
| 18   | 11.78          | 257;354                 | 463                                                     | 301                | Quercetin 3- <i>O</i> -galactoside                         |
| 19   | 12.01          | 270                     | 403                                                     | 223/179            | Sinapoylsiringinic acid <sup>a</sup>                       |
| 20   | 12.18          | 257;354                 | 609                                                     | 301                | Quercetin 3- <i>O</i> -rutinoside                          |
| 21   | 12.18          | 257;354                 | 463                                                     | 301/257            | Quercetin 3- <i>O</i> -glucoside                           |
| 22   | 14.61          | 255;355                 | 623                                                     | 315                | Isorhamnetin 3- <i>O</i> -rhamnosylhexoside 1 <sup>a</sup> |
| 23   | 15.04          | 255;355                 | 623                                                     | 315                | Isorhamnetin 3- <i>O</i> -rhamnosylhexoside 2 <sup>a</sup> |

$t_R$  – retention time for HPLC.

<sup>a</sup> Tentatively identified (Li et al., 2012; Slimestad et al., 2005; Wu et al., 2004).

## References

J. Li, Y. Deng, Ch. Yuan, L. Pan, H. Chai, W. J. Keller, Antioxidant and quinone reductase-inducing constituents of black chokeberry (*Aronia melanocarpa* fruit, *J. Agric. Food Chem.*, 2012, **60**, 11551-11559.

R. Slimestad, K. Torskangerpoll, H. S. Nateland, T. Johannessen, N. H. Giske, Flavonoids from black chokeberries, *Aronia melanocarpa*, *J. Food Comp. Anal.*, 2005, **18**, 61-68.

X. Wu, L. Gu, R. L. Prior, S. McKay, Characterization of anthocyanins and proanthocyanidins in some cultivars of *Ribes*, *Aronia* and *Sambucus* and their antioxidant capacity, *J. Agric. Food Chem.*, 2004, **52**, 7846-7856.
